# Supplementary material
Source: Royal Society of Chemistry journal article supplement (doi:10.1039/d6cc02905a)
Supplement: d6cc02905a1.pdf [file d6cc02905a1.pdf]

**Surface chemistry-controlled growth of NiBDC on carbon nanotubes governs urea oxidation activity**

Danje Meng,<sup>a,b†</sup> Jian Luo,<sup>b†</sup> Lin Tao,<sup>\*c</sup> Xin Tong,<sup>\*a</sup> Mingjie Wu<sup>\*b</sup>

---

*a. School of Chemistry and Materials Science, Guizhou Normal University, Guiyang 550025, China.*

*b. State Key Laboratory of New Textile Materials and Advanced Processing, Wuhan Textile University, Wuhan, 430200 China.*

*c. School of Chemical Engineering, University of Science and Technology Liaoning, Anshan 114051, China*

† These authors contributed equally.

## Experimental Procedures

*Materials:* Cobalt nitrate hexahydrate ( $\text{NiCl}_2 \cdot 6\text{H}_2\text{O}$ , > 98%), potassium hydroxide (KOH, > 95%) and Nafion solution (5 wt%, 99.9%) were all purchased from Sigma-Aldrich; 1,4-dicarboxybenzene acid (BDC, > 99%), urea (> 99.9%), hydroxylated carbon nanotubes, amino-functionalized carbon nanotubes and multi-walled carbon nanotubes were purchased from Macklin Biochemical Co., Ltd; Nickel foam (NF) was purchased from Kunshan Shengshijing new new material Co., Ltd; Ethanol absolute ( $\geq 99.7\%$ ) and N, N-dimethylformamide (DMF, > 99.5%) were bought from Sinopharm Chemical Reagent Co., Ltd. The water used was deionized (DI) water. All the chemicals were used as obtained without further purification.

*Synthesis of NiBDC/CNT-OH:* 20 mg of hydroxylated carbon nanotubes, 11.8 mg of  $\text{NiCl}_2 \cdot 6\text{H}_2\text{O}$ , and 8.3 mg of BDC were dissolved in a mixed solvent of water, ethanol, and N, N-dimethylformamide (DMF) (volume ratio = 1:1:16 mL), and stirred for 30 min to form a homogeneous solution. The obtained solution was transferred into a Teflon-lined autoclave and then heated at 120 °C for 12 h in an oven, followed by naturally cooled down to room temperature. After being repeatedly washed with DMF, ethanol, and deionized (DI) water and dried in an oven at 60 °C, a final product of NiBDC grown on CNT-OH was obtained.

*Synthesis of NiBDC/CNT-NH<sub>2</sub>:* 20 mg of amino-functionalized carbon nanotubes, 11.8 mg of  $\text{NiCl}_2 \cdot 6\text{H}_2\text{O}$ , and 8.3 mg of BDC were dissolved in a mixed solvent of water, ethanol, and N, N-dimethylformamide (DMF) (volume ratio = 1:1:16 mL), and stirred

for 30 min to form a homogeneous solution. The obtained solution was transferred into a Teflon-lined autoclave and then heated at 120 °C for 12 h in an oven, followed by naturally cooled down to room temperature. After being repeatedly washed with DMF, ethanol, and deionized (DI) water and dried in an oven at 60 °C, a final product of NiBDC grown on CNT-NH<sub>2</sub> was obtained.

*Synthesis of NiBDC/CNT:* 20 mg of multi-walled carbon nanotubes, 11.8 mg of NiCl<sub>2</sub>·6H<sub>2</sub>O, and 8.3 mg of BDC were dissolved in a mixed solvent of water, ethanol, and N, N-dimethylformamide (DMF) (volume ratio = 1:1:16 mL), and stirred for 30 min to form a homogeneous solution. The obtained solution was transferred into a Teflon-lined autoclave and then heated at 120 °C for 12 h in an oven, followed by naturally cooled down to room temperature. After being repeatedly washed with DMF, ethanol, and deionized (DI) water and dried in an oven at 60 °C, a final product of NiBDC grown on MWCNT was obtained.

*Synthesis of Ni/CNT-NH<sub>2</sub>:* 20 mg of amino-functionalized carbon nanotubes, and 11.8 mg of NiCl<sub>2</sub>·6H<sub>2</sub>O were dissolved in a mixed solvent of water, ethanol, and N, N-dimethylformamide (DMF) (volume ratio = 1:1:16 mL), and stirred for 30 min to form a homogeneous solution. The obtained solution was transferred into a Teflon-lined autoclave and then heated at 120 °C for 12 h in an oven, followed by naturally cooled down to room temperature. After being repeatedly washed with DMF, ethanol, and deionized (DI) water and dried in an oven at 60 °C, a final product of Ni/CNT-NH<sub>2</sub> was obtained.

*Characterizations:* The morphologies of the as-prepared catalysts were examined by FESEM (Gemini Sigma 360) and HRTEM (Jeol-2100P). The crystal structures of the as-prepared catalysts were measured by XRD (MiniFlex600). Raman spectra of the as-prepared catalysts were measured with a Horiba/LabRAM Odyssey at 532 nm. The functional groups was determined by INVENIO-S Fourier Transform-Infrared Spectroscopy (FT-IR). The test specimens were prepared by the KBr-disk method. The chemical environments of the as-prepared catalysts were measured by XPS (ESCALAB Xi+) with Al K $\alpha$  radiation. All XPS spectra were calculated after correction with C 1 s peak at 284.8 eV. X-ray absorption fine structure (XAFS)spectroscopy was carried out using the Rapid-XAFS IM (Anhui Absorption Spectroscopy Analysis Instrument Co., Ltd.) by transmission mode at 25 kV and 40 mA.

*Electrochemical measurements:* An electrochemical analyzer (CHI 760E) was used to perform all electrochemical experiments in a standard three-electrode configuration. A Hg/HgO electrode filled with 1 M KOH and a graphite rod were used as a reference and counter electrode, respectively. The potential was converted to reversible hydrogen electrode (RHE) via a Nernst equation ( $E_{RHE} = E_{Hg/HgO} + 0.059 \times pH + 0.098$ ). The scan rate of linear sweep voltammetry (LSV) was set to 5.0 mV s<sup>-1</sup>, with potentials ranging from 1.2 to 1.5 V vs. RHE in 1.0 M KOH + 0.33 M urea to investigate the UOR activities of the as-prepared catalysts. All polarization curves were calibrated with the iR correction. CV cycles (CVs) with the scan rates from 20 to 100 mV s<sup>-1</sup> were applied to analyze ECSA. The catalyst ink was formulated by dispersing 3 mg of sample in a mixture of 20  $\mu$ L Nafion solution and 480  $\mu$ L isopropanol, followed by vigorous stirring

for 30 min to achieve homogeneity. Subsequently, 16  $\mu\text{L}$  of the resulting ink was drop-cast onto a L-shaped electrode surface. After ambient drying, this yielded a uniform catalyst loading of  $500 \mu\text{g cm}^{-2}$ .

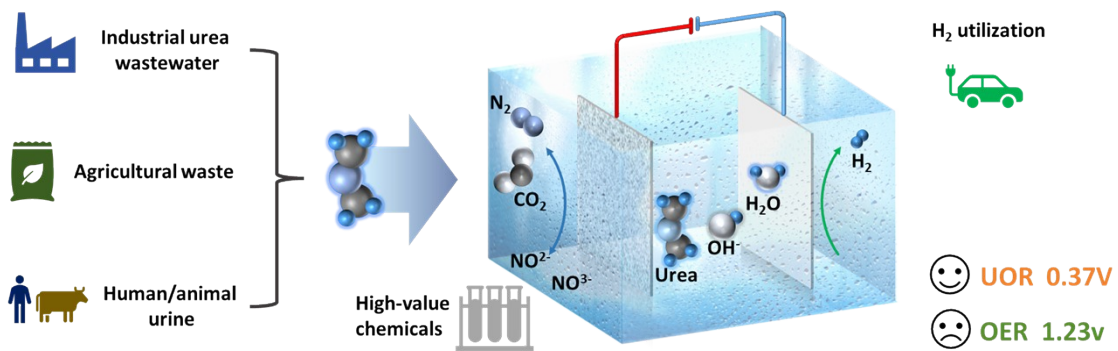

**Fig. S1.** Scenario of the UOR towards clean water and energy production.

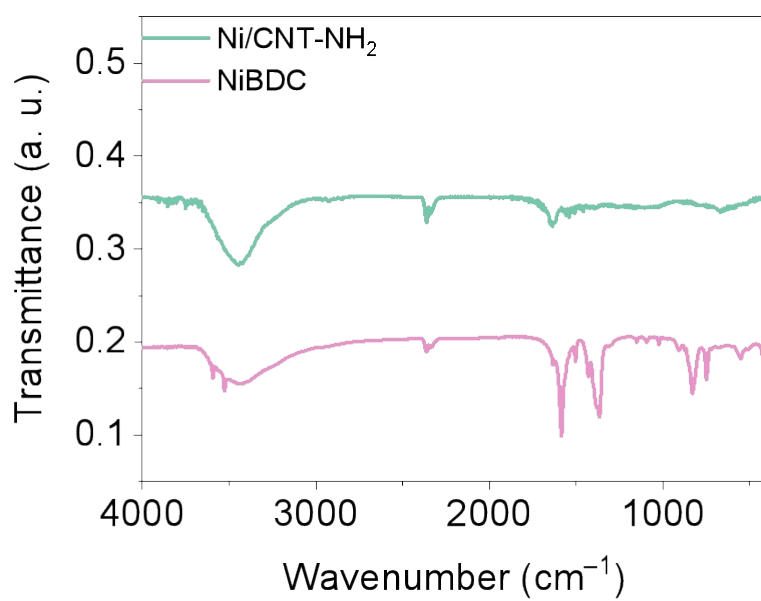

**Fig. S2.** The FT-IR, (b) PXRD, (c) Raman spectra of the NiBDC/CNT-OH, NiBDC/CNT-NH<sub>2</sub> and NiBDC/CNT.

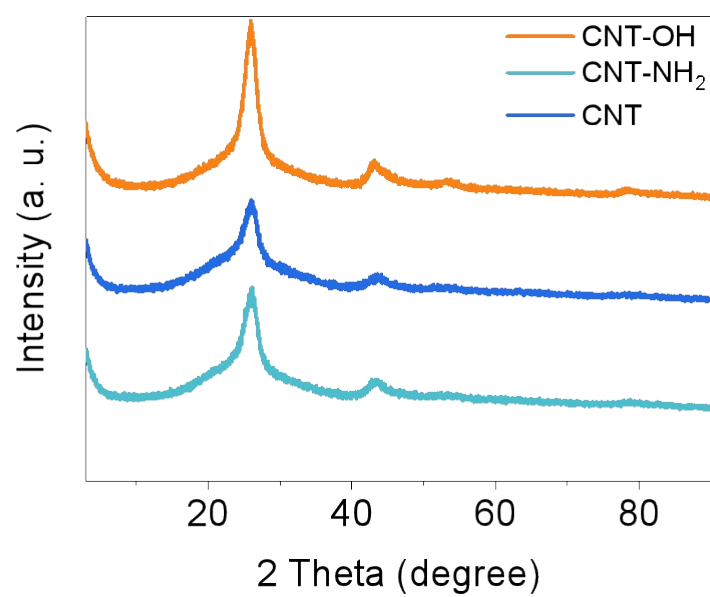

**Fig. S3.** PXRD of the CNT-OH, CNT-NH<sub>2</sub> and CNT.

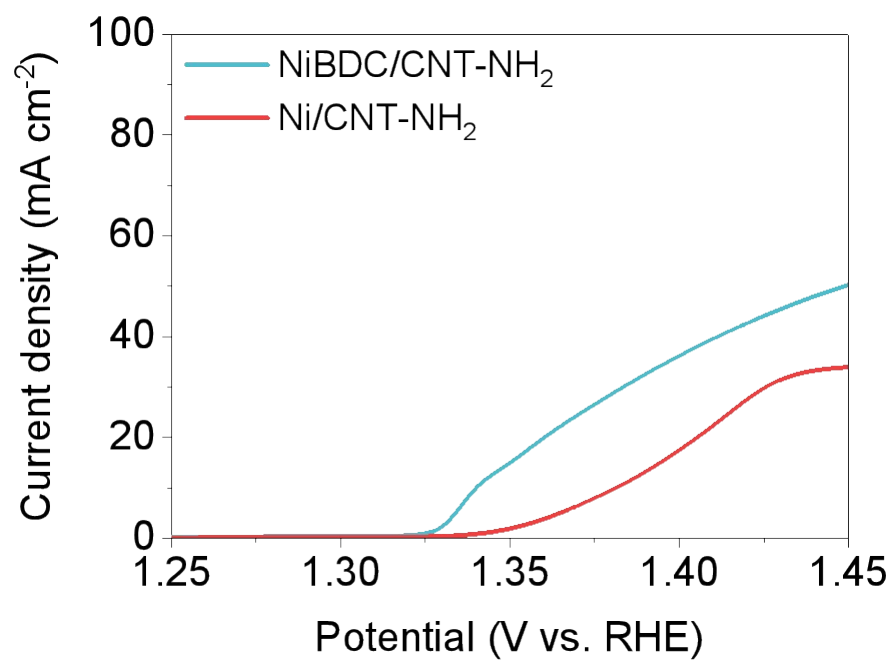

**Fig. S4.** Polarization curves of NiBDC/CNT-NH<sub>2</sub> and Ni/CNT-NH<sub>2</sub> in 1 M KOH + 0.33 M urea

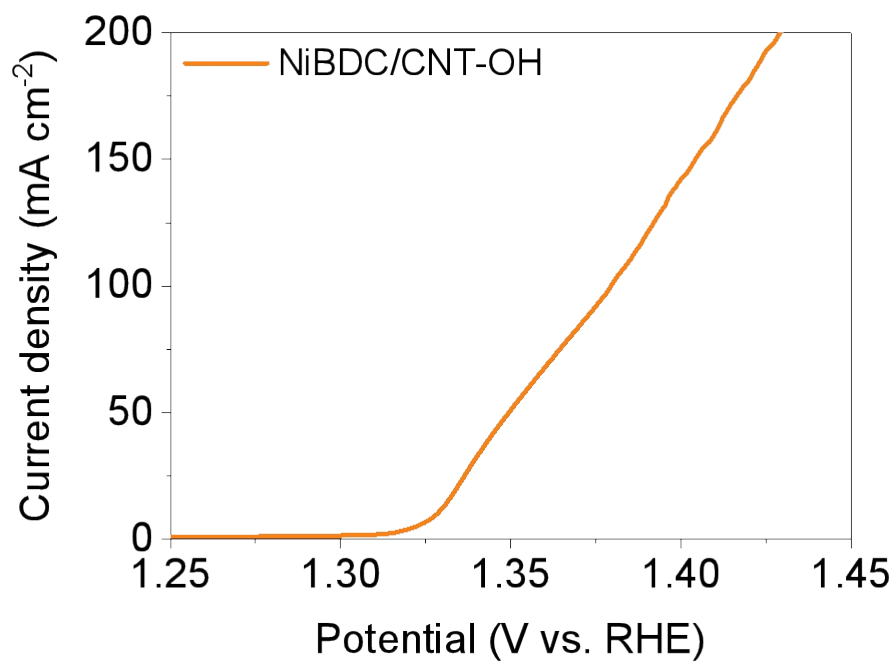

**Fig. S5.** Polarization curves of NiBDC/CNT-OH in 1 M KOH + 0.33 M urea

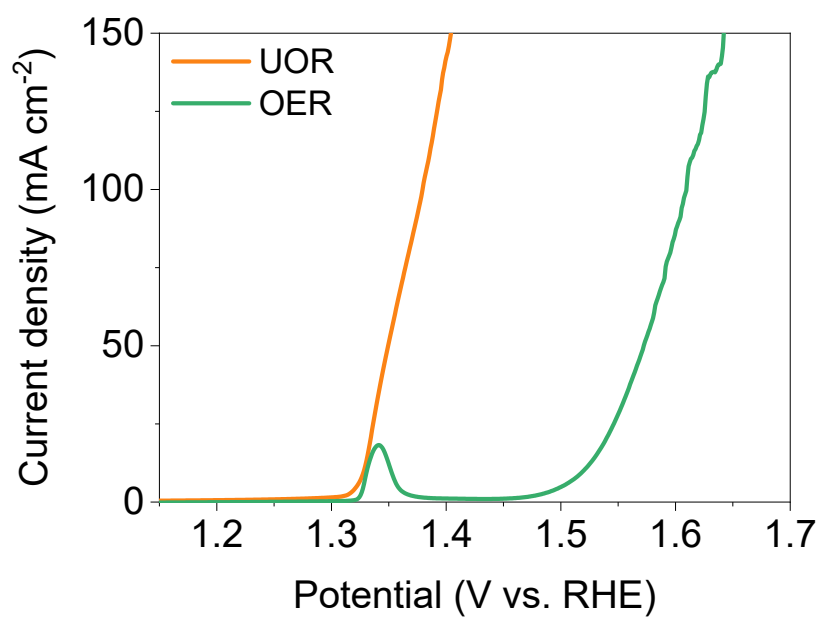

**Fig. S6.** Polarization curves of NiBDC/CNT-OH in 1 M KOH + 0.33 M urea and 1 M KOH.

**Supplementary Table 1.** Comparison of the overpotential of the NiBDC/CNT-OH catalyst with the recently reported powder catalyst at 10 mA cm<sup>-2</sup> current.

| Sample                                                              | Electrolyte              | J<br>(mA<br>cm <sup>-2</sup> ) | Overpotential<br>(V vs.RHE)) | Ref.         |
|---------------------------------------------------------------------|--------------------------|--------------------------------|------------------------------|--------------|
| NiBDC/CNT-OH                                                        | 1 M KOH + 0.33<br>M urea | 10                             | 0.958                        | This<br>work |
| Ni-SO <sub>x</sub>                                                  | 1 M KOH + 0.33<br>M urea | 10                             | 0.968                        | 1            |
| Cu- NiFe LDH                                                        | 1 M KOH + 0.33<br>M urea | 10                             | 0.980                        | 2            |
| CoNi@NCNTs-<br>LDH/CC                                               | 1 M KOH + 0.33<br>M urea | 10                             | 0.989                        | 3            |
| Ni <sub>2</sub> P <sub>4</sub> O <sub>12</sub> /NiTe                | 1 M KOH + 0.33<br>M urea | 10                             | 0.989                        | 4            |
| Fe-Ni <sub>3</sub> S <sub>2</sub> @NiSe <sub>2</sub>                | 1 M KOH + 0.33<br>M urea | 10                             | 0.99                         | 5            |
| Ni <sub>2</sub> Fe(CN) <sub>6</sub>                                 | 1 M KOH + 0.33<br>M urea | 10                             | 0.976                        | 6            |
| Ni (OH) <sub>2</sub> (O <sub>vac</sub> -V-Ni<br>(OH) <sub>2</sub> ) | 1 M KOH + 0.33<br>M urea | 10                             | 1.014                        | 7            |
| NF/NiMoO-Ar                                                         | 1 M KOH + 0.33<br>M urea | 10                             | 1.008                        | 8            |
| Ni(OH) <sub>2</sub> -Ni <sub>3</sub> S <sub>2</sub> /NF             | 1 M KOH + 0.33<br>M urea | 10                             | 0.98                         | 9            |
| TAPP[Fe]-OFPC[Ni]-<br>COF                                           | 1 M KOH + 0.33<br>M urea | 10                             | 1.000                        | 10           |
| P-Mo-Ni <sub>3</sub> S <sub>2</sub> @NF                             | 1 M KOH + 0.50<br>M urea | 10                             | 0.984                        | 11           |
| NiFe LDH/WO <sub>3-x</sub>                                          | 1 M KOH + 0.33<br>M urea | 10                             | 1.034                        | 12           |

- [1] X. Gao, X. Bai, P. Wang et al., Boosting urea electrooxidation on oxyanion-engineered nickel sites via inhibited water oxidation. *Nat. Commun.* **14**, 5842 (2023).
- [2] J. Tang, Z. Li, H. Jang, et al., Local charge modulation induced the formation of high-valent nickel sites for enhanced urea electrolysis. *Adv. Energy Mater.* **14**(41), 2403004 (2024).
- [3] W. W. Tian, J. T. Ren, H. Y. Wang et al., Bioinspired binary-site catalysts for novel urea-assisted Zn-air battery: A transfer station between renewable energy and hydrogen. *App. Catal. B* **354**, 124115 (2024).
- [4] P. Guo, S. Cao, W. Huang et al., Heterojunction-Induced Rapid Transformation of Ni<sup>3+</sup>/Ni<sup>2+</sup> Sites which Mediates Urea Oxidation for Energy-Efficient Hydrogen Production. *Adv. Mater.* **36**(18), 2311766 (2024).
- [5] Y. Zhang, Y. Lei, Y. Yan et al., Enhancing hydrogen production capability from urine-containing sewage through optimization of urea oxidation pathways. *App. Catal. B* **353**, 124064(2024).
- [6] S. K. Geng et al, Nickel ferrocyanide as a high-performance urea oxidation electrocatalyst. *Nat. Energy.* **6**(9),904-912 (2021).
- [7] H. Qin, Y. Ye, J. Li et al., Synergistic engineering of Do\*\* and vacancy in Ni(OH)<sub>2</sub> to boost urea electrooxidation. *Adv. Funct. Mater.* **33**(4), 2209698 (2023).
- [8] Z. Y. Yu, C. C. Lang, M. R. Gao et al., Ni–Mo–O nanorod-derived composite catalysts for efficient alkaline water-to-hydrogen conversion via urea electrolysis. *Energy Environ Sci.* **11**(7), 1890-1897 (2018).
- [9] L. Zhou, D. Feng, C. Liu et al., Amorphous Ni(OH)<sub>2</sub>-Ni<sub>3</sub>S<sub>2</sub>/NF nano-flower heterostructure catalyst promotes efficient urea assisted overall water splitting. *Chem–An Asian J.* **19**(3), 202300980(2024).
- [10] G. Qiao, B. Wang, Z. Zhao, et al. Three-Dimensional Porphyrin and Phthalocyanine-Based Covalent Organic Frameworks for Boosting Urea Oxidation[J]. *Angew. Chem. Int. Ed.* **137**(34), e202508783(2025).
- [11] Y. Zhang, H. Guo, M. Song et al., Modulation of the morphology and electronic structure of Ni<sub>3</sub>S<sub>2</sub> nano-forests via P and Mo Co-Do\*\* in polyoxometalates to promote the urea oxidation reaction. *J. Mater. Chem. A* **11**(7), 3584-3593(2023).

[12]H. L. Liao, X. L. Wu, X. J. Sun et al., Metallic nonstoichiometric  $\text{WO}_{3-x}$ -decorated NiFe-layered double hydroxide for boosted urea electro-oxidation reaction: the facilitated dynamics and increasing active sites. *Tungsten*. 1-6(2024).
